# Supplementary material for: Bi3+/Sb3+ co-doped Cs2HfCl6 vacancy-ordered double perovskites for multifunctional optoelectronic applications
Source: Royal Society of Chemistry journal article supplement (doi:10.1039/d3tc04071b), 2023-12-22
Supplement: d3tc04071b1.pdf [file d3tc04071b1.pdf]

Supporting Information

**Bi<sup>3+</sup>/Sb<sup>3+</sup> Co-doped Cs<sub>2</sub>HfCl<sub>6</sub> Vacancy-ordered Double Perovskite for  
Multifunctional Optoelectronic Applications**

Zixuan Huang,<sup>ab</sup> Jinju Zheng,<sup>\*b</sup> Hui Fu,<sup>b</sup> Jialiang Jiang,<sup>ab</sup> Zilong Li,<sup>ab</sup> Chunhong Gu,<sup>c</sup>

Zhentaο Du,<sup>a</sup> Yangyang,<sup>b</sup> Weiyο Yang<sup>b</sup> and Jialong Zhao<sup>\*ad</sup>

<sup>a</sup>School of Resources, Environment, and Materials, State Key Laboratory of Featured Metal Materials and Life-cycle Safety for Composite Structures, Guangxi University, Nanning, 530004, China.

<sup>b</sup>Institute of Micro/Nano Materials and Devices, Ningbo University of Technology, Ningbo 315211, China.

<sup>c</sup>Ningbo Jiyang New Energy Co., Ltd, Ningbo 315034, China.

<sup>d</sup>School of Physical Science and Technology, Guangxi University, Nanning 530004, China.

\*Corresponding author.

*E-mail addresses:* zhengzhao2007@163.com (J. Zheng), zhaojl@gxu.edu.cn (J. Zhao).

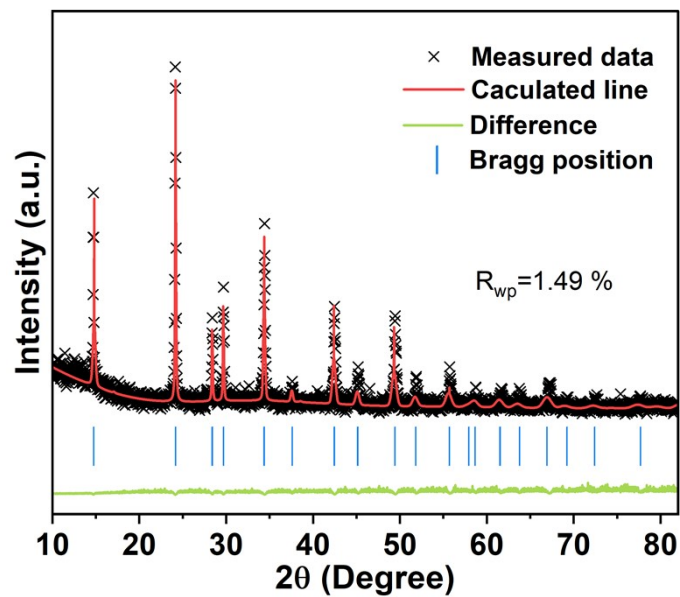

Figure S1. The Rietveld refinement for the XRD pattern of  $\text{Cs}_2\text{HfCl}_6:9\%\text{Bi}^{3+}/10\%\text{Sb}^{3+}$ .

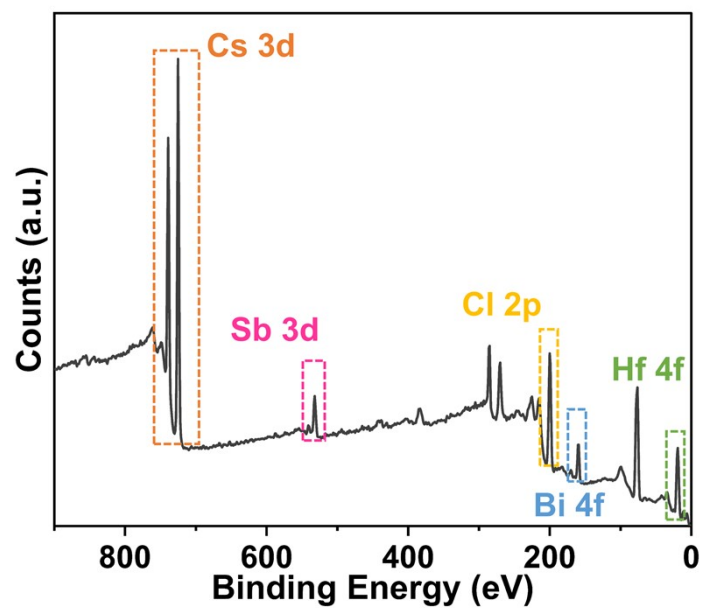

Figure S2. XPS spectrum of  $\text{Cs}_2\text{HfCl}_6:9\%\text{Bi}^{3+}/10\%\text{Sb}^{3+}$ .

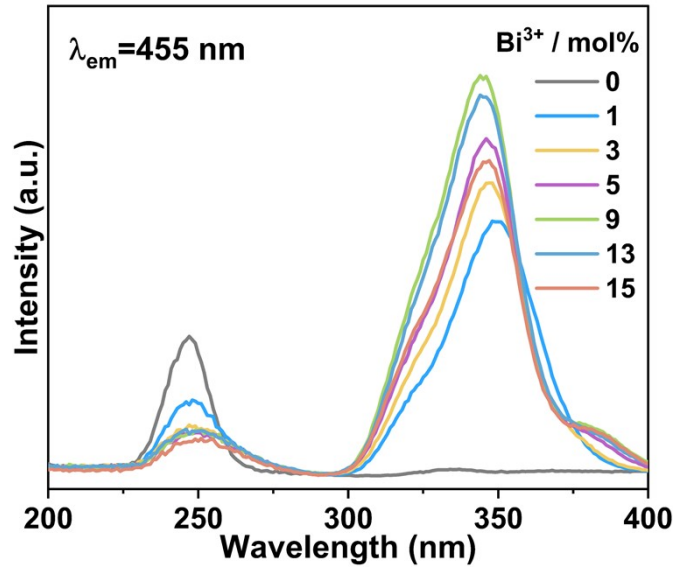

**Figure S3.** PL excitation (PLE) spectra of  $\text{Cs}_2\text{HfCl}_6:x\%\text{Bi}^{3+}$  ( $\lambda_{\text{em}}=455$  nm).

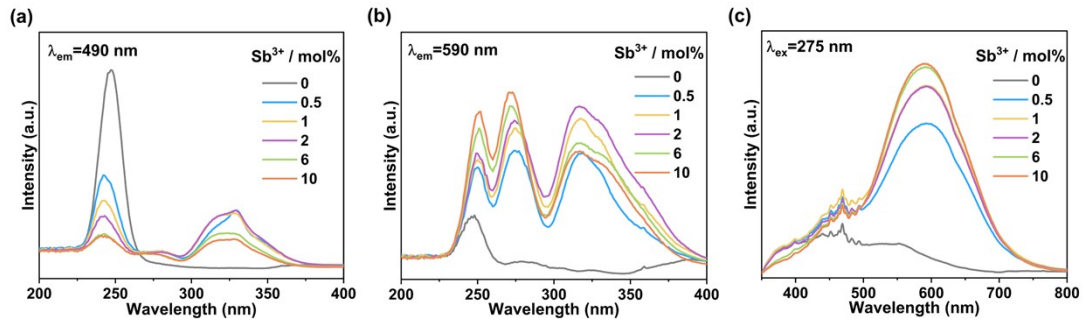

**Figure S4.** PL excitation spectra monitored at (a)  $\lambda_{\text{em}}=490$  nm and (b)  $\lambda_{\text{em}}=590$  nm and (c) PL emission spectra excited with  $\lambda_{\text{ex}}=275$  nm of  $\text{Cs}_2\text{HfCl}_6:y\%\text{Sb}^{3+}$  MCs with different  $\text{Sb}^{3+}$  concentrations.

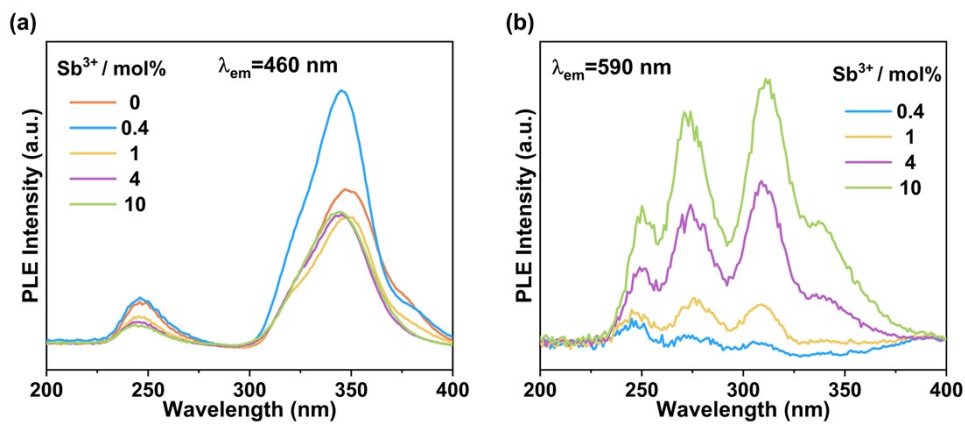

**Figure S5.** PL excitation spectra (a)  $\lambda_{\text{em}}=460$  nm and (b)  $\lambda_{\text{em}}=590$  nm of  $\text{Cs}_2\text{HfCl}_6:9\%\text{Bi}^{3+}/y\%\text{Sb}^{3+}$  MCs with different  $\text{Sb}^{3+}$  concentrations.

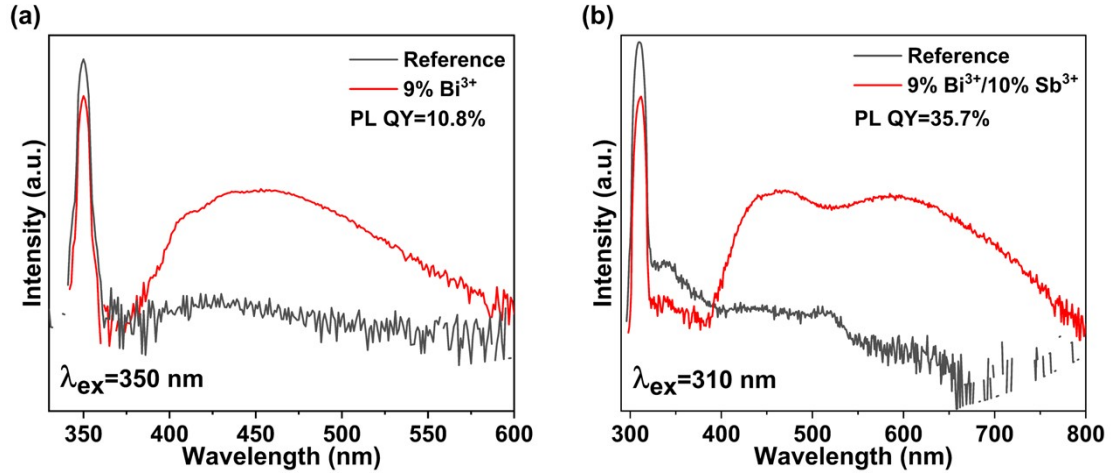

**Figure S6.** PL QYs of (a)  $\text{Cs}_2\text{HfCl}_6:9\%\text{Bi}^{3+}$ , (b)  $\text{Cs}_2\text{HfCl}_6:9\%\text{Bi}^{3+}/10\%\text{Sb}^{3+}$ .

**Table S1** The ICP results of  $\text{Cs}_2\text{HfCl}_6:9\%\text{Bi}^{3+}/10\%\text{Sb}^{3+}$  sample

| Bi (mmol/mL) | Sb (mmol/mL) | Hf (mmol/mL) | $\text{Bi}^{3+}$ content (%) | $\text{Sb}^{3+}$ content (%) |
|--------------|--------------|--------------|------------------------------|------------------------------|
| 3.11         | 2.82         | 75.8         | 4.1                          | 3.7                          |

**Table S2** PL decay curve of  $\text{Cs}_2\text{HfCl}_6:x\%\text{Bi}^{3+}$  ( $\lambda_{\text{ex}}=365$  nm,  $\lambda_{\text{em}}=455$  nm)

| x mol% $\text{Bi}^{3+}$ | 0      | 1      | 3      | 5      | 9      | 13     | 15     |
|-------------------------|--------|--------|--------|--------|--------|--------|--------|
| $\tau$ (ns)             | 753.66 | 723.52 | 667.45 | 680.00 | 684.04 | 663.37 | 680.83 |

**Table S3** PL decay curves of  $\text{Cs}_2\text{HfCl}_6:y\%\text{Sb}^{3+}$  ( $\lambda_{\text{ex}}=365$  nm,  $\lambda_{\text{em}}=490$  nm)

| y mol% $\text{Sb}^{3+}$ | $\tau_1$ | Rel.% | $\tau_2$ | Rel.% | $\tau_{\text{ave}}$ (ns) |
|-------------------------|----------|-------|----------|-------|--------------------------|
| 0.5                     | 83.59    | 14.52 | 1811.03  | 85.48 | 1560.27                  |
| 1                       | 85.07    | 21.88 | 1882.39  | 78.12 | 1489.15                  |
| 2                       | 89.48    | 27.69 | 2062.52  | 72.31 | 1516.25                  |
| 6                       | 89.85    | 30.47 | 2186.32  | 69.53 | 1547.63                  |
| 10                      | 87.41    | 30.14 | 2291.40  | 69.86 | 1627.19                  |

**Table S4** PL decay curve of Cs<sub>2</sub>HfCl<sub>6</sub>:y%Sb<sup>3+</sup> ( $\lambda_{\text{ex}}$ =365 nm,  $\lambda_{\text{em}}$ =590 nm)

| y mol% Sb <sup>3+</sup> | 0.5     | 1       | 2       | 6       | 10      |
|-------------------------|---------|---------|---------|---------|---------|
| $\tau$ (ns)             | 5683.09 | 5770.40 | 5670.02 | 5638.20 | 5631.59 |
